# Supplementary material for: Dually cross-linked single network poly(acrylic acid) hydrogels with superior mechanical properties and water absorbency
Source: Royal Society of Chemistry journal article supplement (doi:10.1039/c6sm00242k), 2016-01-01
Supplement: c6sm00242k1.pdf [file c6sm00242k1.pdf]

## Electronic Supplementary Information

### **Dually cross-linked single network poly(acrylic acid) hydrogels with superior mechanical properties**

Ming Zhong<sup>a</sup>, Yi-Tao Liu<sup>a</sup>, Xiao-Ying Liu<sup>a</sup>, Fu-Kuan Shi<sup>a</sup>, Li-Qin Zhang<sup>a</sup>, Meifang Zhu<sup>b</sup> and Xu-Ming Xie<sup>a\*</sup>

<sup>a</sup>Key Laboratory of Advanced Materials (MOE), Department of Chemical Engineering, Tsinghua University, Beijing 100084, China.

<sup>b</sup>State Key Laboratory for Modification of Chemical Fibers and Polymer Materials, College of Materials Science and Engineering, Donghua University, Shanghai 201620, China.

\*E-mail: [xm-dce@mail.tsinghua.edu.cn](mailto:xm-dce@mail.tsinghua.edu.cn)

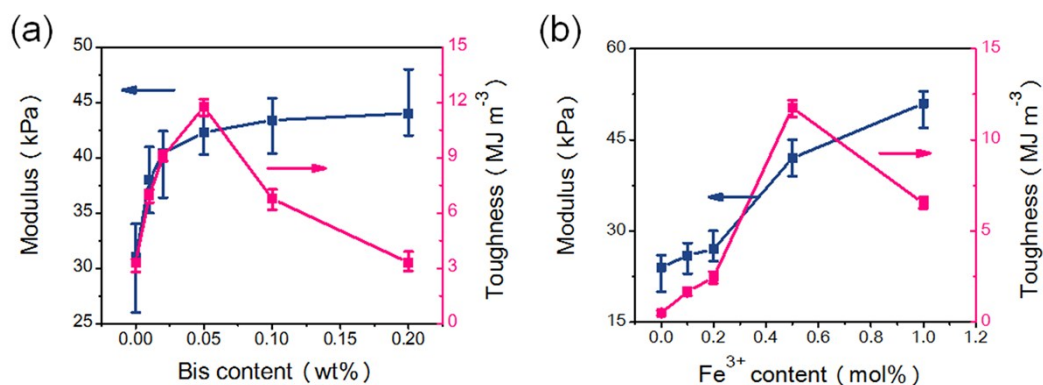

**Fig. S1** Influence of (a) Bis, and (b) Fe<sup>3+</sup> contents on the initial modulus and fracture toughness of the *d*-PAA gels.

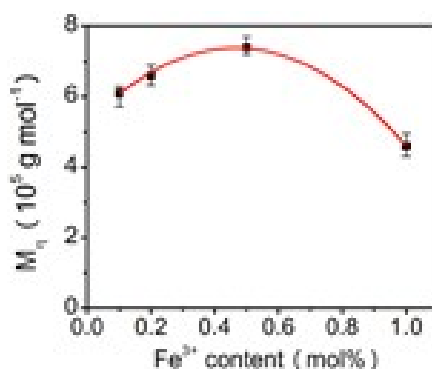

**Fig. S2** Influence of Fe<sup>3+</sup> content on the macromolecular weight of the *i*-PAA gels.

First, the *i*-PAA gels (free of Bis) were added to a certain amount of chelating agent solution, ethylene diamine tetraacetic acid (EDTA), and stirred at room temperature till the *i*-PAA gels were dissolved completely. After that the solution was dialyzed for 1 week in order to remove the Fe<sup>3+</sup> ions and chelating agent. Linear PAA was separated from the solution by neutralization with NaOH and then by precipitation with methanol. The viscosity measurements were performed by a standard Ubbelohde viscometer, in 0.1 mol L<sup>-1</sup> NaBr solution, at 25 °C and pH = 7. The viscous average molecular weight (M<sub>n</sub>) of PAA from the *i*-PAA gels was measured and calculated, according to the Mark-Houwink-Sakurada equation:

$$[\eta] = kM_n^\alpha$$

We used Francois relation<sup>1</sup>:  $K = 3.12 \times 10^{-5} L g^{-1}$ ,  $\alpha = 0.755$ .

$$[\eta] = 3.12 \times 10^{-5} M_n^{0.755} (g mL^{-1}).$$

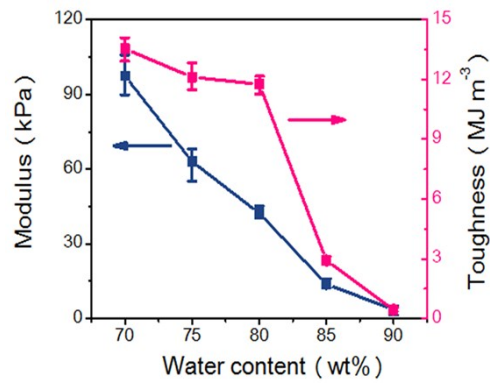

**Fig. S3** Influence of water content on the modulus and toughness of the *d*-PAA gels.

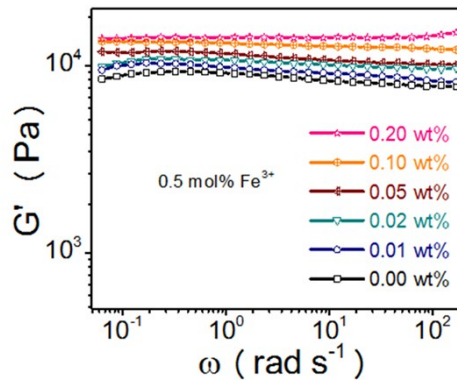

**Fig. S4** Influence of Bis content on the storage modulus of the *d*-PAA gels

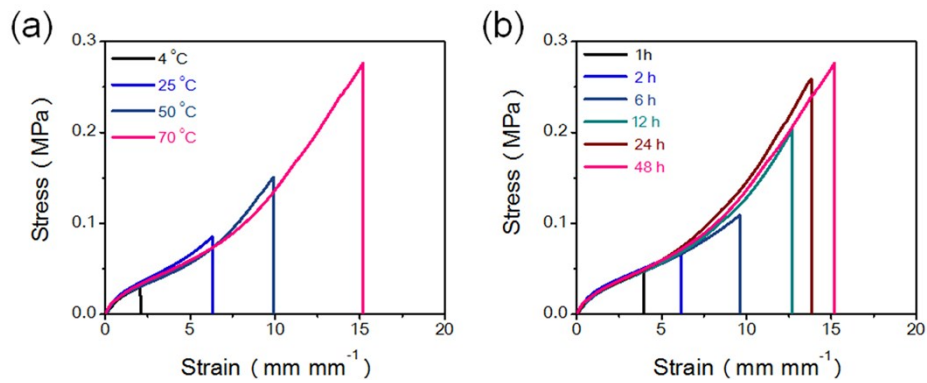

**Fig. S5** Typical stress–strain curves of the self-healed *d*-PAA gels ( $\text{Fe}^{3+} = 0.5 \text{ mol\%}$ , Bis = 0.05 wt%,  $\text{H}_2\text{O} = 80 \text{ wt\%}$ ) with (a) temperature and (b) time as a function.

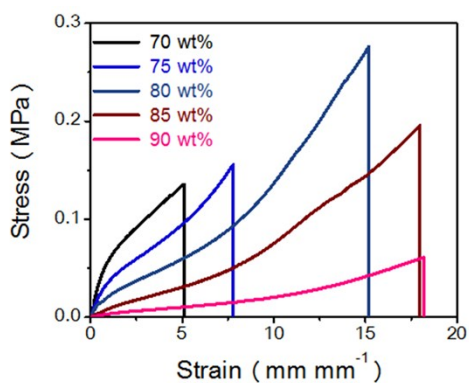

**Fig. S6** Typical stress–strain curves of the self-healed *d*-PAA gels ( $\text{Fe}^{3+} = 0.5 \text{ mol\%}$ ,  $\text{Bis} = 0.05 \text{ wt\%}$ ) with different water contents.

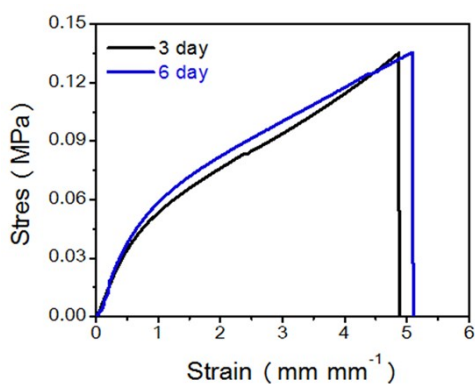

**Fig. S7** Typical stress–strain curves of the self-healed *d*-PAA gels ( $\text{Fe}^{3+} = 0.5 \text{ mol\%}$ ,  $\text{Bis} = 0.05 \text{ wt\%}$ ,  $\text{H}_2\text{O} = 70 \text{ wt\%}$ ) with time as a function.

#### Notes and references

S1. J. Brandrup, E. H. Immergut, E. A. Grulke, *Polymer Handbook*. John Wiley & Sons, Inc.: New York, 1999.
